# Supplementary material for: Co-immunization with spike and nucleocapsid based DNA vaccines for long-term protective immunity against SARS-CoV-2 Omicron
Source: PubMed Central journal article supplement — NPJ Vaccines. 2024 Dec 19;9:252. doi: 10.1038/s41541-024-01043-3 (PMC11659323; doi:10.1038/s41541-024-01043-3), 2024-12-19
Supplement: 41541_2024_1043_MOESM1_ESM.pdf [file 41541_2024_1043_MOESM1_ESM.pdf]

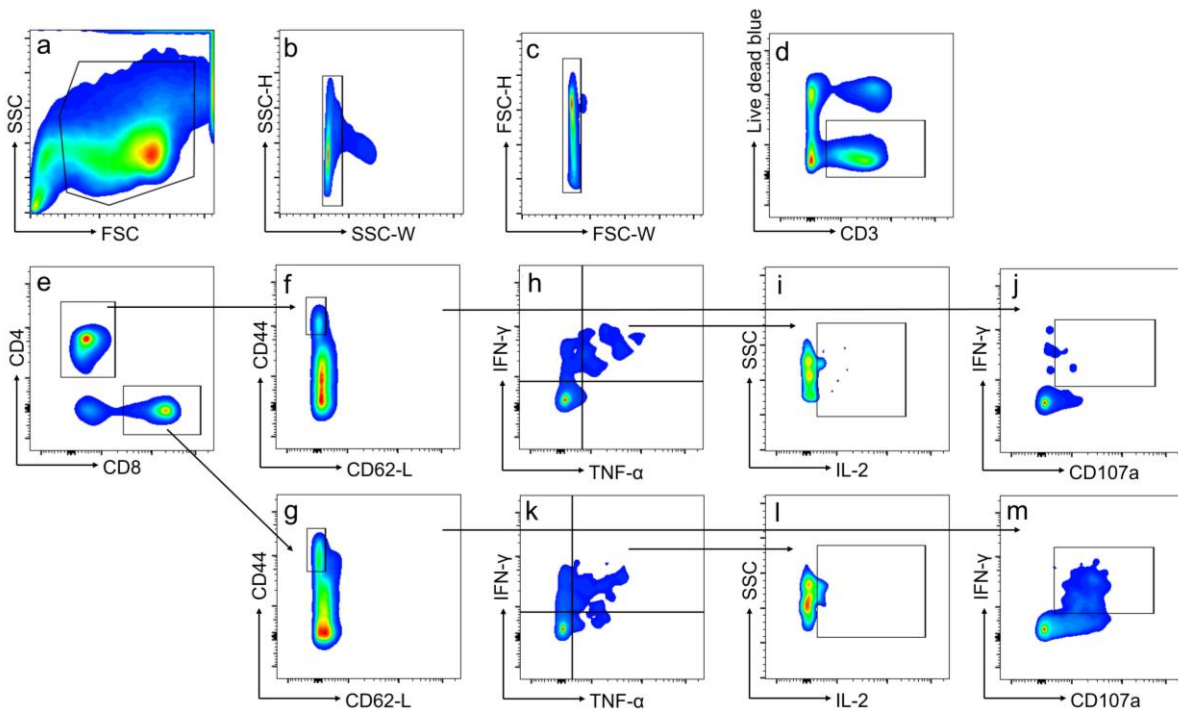

**Supplementary Figure 1. Representative gating strategy for Figure 2 experiment.**

Standardized analysis data for splenocytes from a mouse in the S+N vaccine group stimulated with N<sub>219-227</sub> peptide, as described in the methods. **(a)** The lymphocyte region was selected through the parameters of size and granularity (FSC x SSC), followed by the exclusion of double events **(b,c)**. Cells were selected first for viable CD3<sup>+</sup> cells **(d)**, second for CD4<sup>+</sup> or CD8<sup>+</sup> T cells **(e)**, and finally for effector memory cells (CD44<sup>+</sup>CD62L<sup>-</sup>) **(f,g)**. In the effector memory population, polyfunctional T cells were selected by expression of IFN- $\gamma$ <sup>+</sup>TNF- $\alpha$ <sup>+</sup> **(h,k)** or IFN- $\gamma$ <sup>+</sup>TNF- $\alpha$ <sup>+</sup>IL-2<sup>+</sup> **(i,l)**, and cytotoxic lymphocytes by expression of IFN- $\gamma$ <sup>+</sup>/CD107a<sup>+</sup> **(j,m)**. For each sample, 50,000 events were acquired within the region of viable CD3<sup>+</sup> lymphocytes, and results represented as the total number of cells within this population.

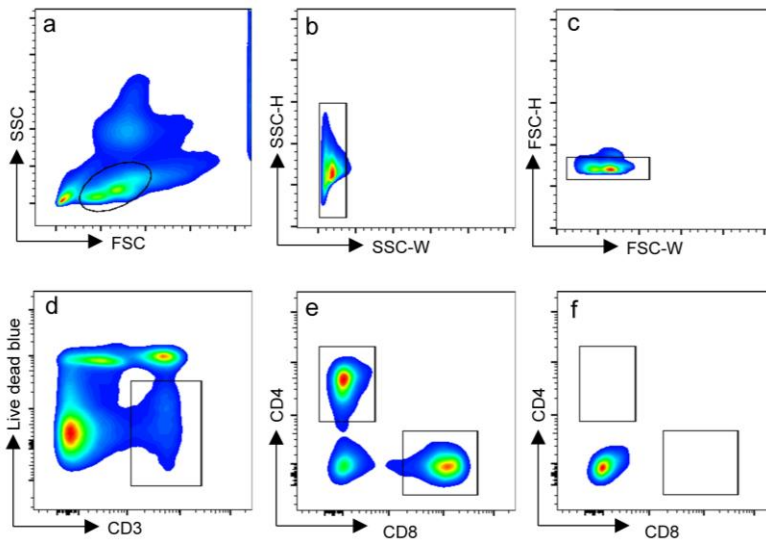

**Supplementary Figure 2. Representative gating strategy for Figure 6 experiment.**

Representative data for blood cells from S+N-inoculated mice after injection with anti-CD4/CD8 or isotype control mAbs, as described in the methods. **(a)** The lymphocyte region was selected by size and granularity (FSC x SSC), followed by exclusion of double events **(b,c)**. Cells were selected for viable CD3<sup>+</sup> cells **(d)**, and then for the population of total CD4<sup>+</sup> or CD8<sup>+</sup> T cells in samples from mice injected with either isotype control Ab **(e)** or anti-CD4/CD8 Abs **(f)**. For each sample, 20,000 events were acquired within the region of viable CD3<sup>+</sup> lymphocytes.
